1 **Adverse childhood experiences: associations with educational attainment and**  
2 **adolescent health, and the role of family and socioeconomic factors. Analysis of a**  
3 **prospective cohort study.**

4

5 Lotte C Houtepen<sup>1</sup>, Jon Heron<sup>1</sup>, Matthew J Suderman<sup>1</sup>, Abigail Fraser<sup>1</sup>, Catherine R  
6 Chittleborough<sup>2</sup>, Laura D Howe<sup>1</sup>#

7

8 1 MRC Integrative Epidemiology Unit at the University of Bristol, Population Health Sciences,  
9 Bristol Medical School, University of Bristol, Bristol, UK.

10 2 School of Public Health, Faculty of Health and Medical Sciences, and Robinson Research  
11 Institute, University of Adelaide, Adelaide, Australia

12

13

14 #Corresponding author: [laura.howe@bristol.ac.uk](mailto:laura.howe@bristol.ac.uk). MRC Integrative Epidemiology Unit,  
15 University of Bristol, Oakfield House, Bristol BS8 2BN, UK. +44 (0)117 3310134

16

17

18 Short title: ACE and role of family and socioeconomic factors

19

20

21

22

23 **Abstract**

24

25 **Background:** Experiencing multiple adverse childhood experiences (ACE) is a risk factor for  
26 many adverse outcomes. However, the role of family and socioeconomic factors in these  
27 associations is often overlooked.

28 **Methods and findings:** Using data from the Avon Longitudinal Study of Parents and Children,  
29 we assess associations of ACE between birth and 16 years (sexual, physical or emotional  
30 abuse, emotional neglect, parental substance abuse, parental mental illness or suicide attempt,  
31 violence between parents, parental separation, bullying, and parental criminal conviction) with  
32 educational attainment at 16 years (n=9,959) and health at age 17 years (depression, obesity,  
33 harmful alcohol use, smoking and illicit drug use, n=4,917). We explore the extent to which  
34 associations are robust to adjustment for family and socioeconomic factors, whether  
35 associations differ according to socioeconomic factors, and estimate the proportion of adverse  
36 educational and health outcomes attributable to ACE, family or socioeconomic measures.

37 There were strong associations of ACE with lower educational attainment and higher risk of  
38 depression, drug use and smoking. Associations with educational attainment attenuated after  
39 adjustment but remained strong. Associations with depression, drug use and smoking were not  
40 altered by adjustment. Associations of ACE with harmful alcohol use and obesity were weak.  
41 We found no evidence that associations differed by socioeconomic factors. Between 5-15% of  
42 the cases of adverse educational and health outcomes occur amongst people experiencing 4+  
43 ACE, and between 1-19% occur in people whose mothers have a low level of education.

44 **Conclusions:** This study demonstrates strong associations between ACE and lower  
45 educational attainment and worse health that are independent of family and socioeconomic  
46 factors. Our findings imply that interventions that focus solely on ACE or solely on  
47 socioeconomic deprivation, whilst beneficial, would miss most cases of adverse educational and  
48 health outcomes. Intervention strategies should therefore target a wide range of relevant  
49 factors, including ACE, socioeconomic deprivation, parental substance use and mental health.

50

51 **Keywords:** adverse childhood experiences; socioeconomic factors; education; health; ACE;  
52 ALSPAC

53

54

## 55 **Introduction**

56 There is increasing awareness of the role that adverse childhood experiences (ACE) can play in  
57 influencing educational attainment, physical and mental health.[1-6] ACE is rising rapidly on  
58 policy agendas and there is a drive within public health and education to prevent ACE, develop  
59 and implement interventions to improve resilience, and promote ACE-aware services.[7-10]

60

61 The definition of ACE varies between studies and is the subject of debate[11], but the  
62 adversities most commonly studied include child maltreatment (e.g. emotional, physical and  
63 sexual abuse, physical or emotional neglect) and measures of household dysfunction (e.g.  
64 violence between parents, parental separation and parental substance misuse, mental illness or  
65 criminal behaviour). It is well established that these adverse experiences are not randomly  
66 distributed across a population; socioeconomic disadvantage is a strong risk factor for ACE.[12-  
67 14] In the Avon Longitudinal Study of Parents and Children (ALSPAC), we have previously  
68 shown that young people from families with low social class have twice the prevalence of four or  
69 more ACE compared with young people from high social class families.[15] There is some  
70 debate about whether poverty should itself be considered an ACE; advocates point to the link  
71 between poverty and ACE and the advocacy advantages of having poverty included in the  
72 definition of ACE[16], whereas detractors view poverty as a structural issue, and highlight that  
73 ACE occur across the socioeconomic spectrum.[17] Here, we view socioeconomic  
74 disadvantage and ACE as separate phenomena.

75

76 Despite socioeconomic disadvantage being a major risk factor for ACE, the conversation about  
77 ACE rarely focuses on the inter-relationships between ACE and socioeconomic conditions or  
78 other family-level factors, and the implications of this for policy.[18] There is an extensive

79 literature on factors that promote resilience to ACE[19-21], but there is relatively little focus in  
80 the literature on whether associations between ACE and adverse outcomes are weaker in  
81 children from socioeconomically advantaged families (one way of conceptualising resilience).

82

83 In this paper, we use data from a UK prospective cohort study to examine the associations of  
84 ACE from 0-16 years with educational attainment at 16 years and markers of adolescent health  
85 and health-related behaviours at age 17 years (depression, obesity, harmful alcohol use,  
86 smoking and illicit drug use). We assess the degree to which these associations are robust to  
87 adjustment for a wide range of family and socioeconomic characteristics, and we test the  
88 hypothesis that associations between ACE and education and health outcomes will be stronger  
89 in people from families with low socioeconomic position. We calculate population attributable  
90 fractions for each outcome for ACE and for several socioeconomic and family-related measures,  
91 to assess the relative contributions of each of these factors to adverse educational and health  
92 outcomes, with the motivation of understanding the proportion of cases of these adverse  
93 outcomes that could potentially be prevented by interventions focused solely on ACE.

94

## 95 **Methods**

### 96 *Participants*

97 The Avon Longitudinal Study of Parents and Children (ALSPAC) is a prospective, population-  
98 based birth cohort study that recruited 14,541 pregnant women resident in Avon, UK, with  
99 expected delivery dates between the 1st April 1991 and 31st December 1992.[22, 23] The  
100 mothers, their partners and the child have been followed-up using clinics, questionnaires and  
101 links to routine data. The study website contains details of all the data that is available through a

102 fully searchable data dictionary: <http://www.bris.ac.uk/alspac/researchers/data-access/data->  
103 [dictionary/](http://www.bris.ac.uk/alspac/researchers/data-access/data-dictionary/). Ethical approval for this study was obtained from the ALSPAC Law and Ethics  
104 Committee and the Local Research Ethics Committees.

105

106 To ensure sufficient data to inform multiple imputation, we excluded children with data on fewer  
107 than 10% of the ACE questions (n=2604). After this exclusion, 11,935 participants remained.  
108 We created separate analysis samples for analysis of educational attainment and health  
109 outcomes by restricting to participants with at least one outcome measure; we also excluded  
110 one child from within each twin pair (n=152) to maintain independence of observations. This  
111 resulted in final sample sizes of 9,959 for educational outcomes (obtained through linkage to  
112 routine data) and 4,917 for health outcomes (assessed at a research clinic).

113

#### 114 *Adverse childhood experiences*

115 Data on multiple forms of ACE were reported by both participants themselves and their mothers  
116 at multiple time points. Full details of the derivation of ACE measures has been described  
117 previously.[15] Briefly, dichotomous constructs indicating exposure to adversities between birth  
118 and 16 years were created for the ten ACE that are included in the World Health Organization  
119 ACE international questionnaire[24] (sexual abuse, physical abuse, emotional abuse, emotional  
120 neglect, parental substance abuse, parental mental illness or suicide attempt, violence between  
121 parents, parental separation, bullying and parental criminal conviction). The definitions are  
122 described in Supplemental Table 1. Most ACE data were collected prospectively, but some (in  
123 particular, sexual abuse) included retrospective reports.

124

125 *Educational attainment*

126 ALSPAC data were linked to the National Pupil Database (NPD). This is a governmental  
127 database providing data on pupil level attainment in state funded schools in England. General  
128 Certificate of Secondary Education (GCSE) examinations are sat during the 11th year of  
129 compulsory schooling when children are aged 15/16 (years 2007–2009 for the ALSPAC cohort).  
130 Pupils study up to 12 subjects (8 on average). The subjects are graded individually on a scale of  
131 A\* (highest) to G (lowest). For this analysis, we used a dichotomous indicator of less than five  
132 ‘good’ GCSEs (five or more grades A\*-C including English and Mathematics), which is a widely-  
133 used benchmark of academic achievement in the UK and a requirement for entry into many  
134 further education courses.

135

136 *Health and health-related behaviours at age 17*

137 During a research clinic at age 17 years (mean 17 years and 9 months, SD 4 months), weight  
138 was measured to the nearest 50g using the Tanita Body Fat Analyser (Model TBF 401A), with  
139 participants in underwear or light clothing and footwear removed. Height was measured using a  
140 Harpenden stadiometer to the last complete mm, with participants unshod. Body mass index  
141 was calculated as weight in kilograms divided by height in metres squared. Substance use and  
142 mental health were assessed using self-administered computer-assisted interviews. We derived  
143 the following dichotomous indicators:

- 144 • Obesity: Body mass index (BMI) was converted into sex- and age-specific Z-scores  
145 relative to UK 1990 population reference data. These Z-scores were used to define  
146 obesity based on published BMI Z-score cut-offs from the International Obesity Task  
147 Force (BMI-Z  $\geq$  2.212 for boys and BMI-Z  $\geq$  2.195 for girls).

- 148       • Regular smoking: We created a dichotomous indicator of smoking weekly or more  
149       versus no smoking or smoking less than weekly.
- 150       • Harmful drinking:  $\geq$  16 on the 10-item alcohol use disorders identification test (audit).[25]
- 151       • Depression: based on the clinical interview schedule-revised (CIS-R), defined as  
152       meeting the depression diagnosis criteria of the international classification of diseases,  
153       10th revision.[26]
- 154       • Illicit drug use: problematic cannabis use or, in the past 12 months, any use of any of the  
155       following substances: cocaine, amphetamines, inhalants, sedatives, hallucinogens, or  
156       opioids. Problematic cannabis use was measured using the six-item cannabis abuse  
157       screen test[27], which assesses cannabis consumption in the previous 12 months and  
158       focuses on difficulties controlling use and associated health and social impairment. All  
159       items are answered on a 5-point scale (0 never, 1 rarely, 2 from time to time, 3 fairly  
160       often, and 4 very often). A response of fairly often or very often to any of the six items  
161       was used to indicate problem cannabis use.

162

### 163 *Confounders*

164 At enrolment and prior to delivery, several self-report questionnaires were administered that  
165 measured socio-economic, family and (mental) health variables. Based on these parental  
166 questionnaires, the following covariables were included in the analysis: mother's home  
167 ownership status during pregnancy (Mortgaged/ Owned/ Council rented/ Furnished private  
168 rental/ Unfurnished private rental/ Housing authority rented/ Other), mother and partner's  
169 highest educational qualification (CSE/ Vocational/ O-level/ A-level/ Degree), household social  
170 class (highest of mother and partner social class according to the Registrar General's Social  
171 Classes: professional/ managerial and technical/ skilled non-manual/ partly skilled/ unskilled),

172 parity, maternal report of child's ethnicity (white/non-white), mother's age at delivery (in years),  
173 mother's marital status during pregnancy (Never married/ Widowed/ Divorced/ Separated/ 1<sup>st</sup>  
174 marriage/ Marriage 2 or 3), mother's depression score (EPDS) at 18 and 32 weeks gestation  
175 and mother's partner depression score (EPDS) at 18 weeks gestation. More details on these  
176 variables and their distributions are available in Supplemental Table 2.

177

### 178 *Missing data*

179 Due to the derivation of ACE measures from multiple questionnaires and clinics over a long time  
180 period (birth-23 years), no participants had data on all of the individual questionnaire items,  
181 necessitating the use of multivariate multiple imputation. Ideally, we would impute missing  
182 values of each questionnaire item, but the lack of complete cases in combination with the high  
183 number of variables (>500 separate questions relating to ACE) led to convergence errors.  
184 Therefore, we adopted a pragmatic approach to imputation, adapted from the scale level  
185 imputation method proposed by Enders.[28] We derived a dichotomous construct indicating  
186 presence or absence of each ACE. If a participant responded to 50% or more of the questions  
187 related to a given ACE, we used these data to create the dichotomous indicator. If the  
188 participant responded to less than 50% of the questions, we set the dichotomous indicator to  
189 missing. We derived a cumulative adversity measure (ACE-score) by summing exposure to the  
190 ten classic ACE, defining four categories (0, 1, 2-3 and more than 4 ACE). Due to the  
191 considerably larger sample size available for educational attainment than for health measures,  
192 these groups of outcomes were considered in separate imputation models. As there are some  
193 sex differences in ACE prevalence (Supplemental Table 2) and potentially higher order  
194 interactions between sex and adversity that we want to preserve, males (education n=5,023,  
195 health n=2,163) and females (education n=4,936, health n=2,754) were imputed separately



196 before appending the two datasets before analysis. The dichotomous ACE indicators and the  
197 ACE score were included in multiple imputation models, along with outcome variables and  
198 auxiliary variables likely to predict either missingness, ACE exposure or health status  
199 (sociodemographic indicators, adversity measures from before the child's birth, and additional  
200 education and health variables – additional details in Supplementary Table 3 and full details in  
201 previous publication[15]). For both males and females, 90 imputed datasets were created using  
202 the mice package in R3.3.1 with 30 iterations per dataset. For secondary analyses exploring  
203 interactions between ACE and parental social class or maternal education, imputation models  
204 were re-run stratified by dichotomous indicators of i) parental social class (manual versus non-  
205 manual, highest social class of mother or partner) and ii) maternal education (CSE, vocational  
206 education or lower versus O-level, A-level, degree or higher).

207

### 208 *Statistical analyses*

209 All statistical modelling was done in R version 3.3.1 unless otherwise specified, using binary  
210 logistic regression models for all outcomes. Associations of each separate ACE and the ACE-  
211 score with each outcome were assessed in a basic model (adjusted for sex) as well as a fully-  
212 adjusted model (adjusted for home ownership, maternal and partner education, household  
213 social class, parity, ethnicity, maternal age, maternal marital status, maternal and partner  
214 depression during pregnancy). For the imputed data, the logistic regression results were  
215 obtained by averaging across the results from each of the 90 imputed datasets using Rubin's  
216 rules. This procedure appropriately modifies the standard errors for regression coefficients  
217 (used to calculate p-values and 95% confidence intervals) to take account of uncertainty in both  
218 the imputations and the estimate. Likelihood ratio test statistics were combined using an  
219 approximation proposed by Meng and Rubin.[29] As a sensitivity analysis, we replicated these

220 analyses in people with ‘complete’ data, i.e. participants who responded to more than 50% of  
221 the questionnaire items for all ACE and who had data on the outcomes.

222

223 To examine whether the associations differed according to sex we used likelihood ratio tests for  
224 interaction, and if applicable report the results of sex stratified analyses. We also used likelihood  
225 ratio tests to assess interactions between ACE and manual versus non-manual parental social  
226 class and low versus high maternal education.

227

228 Prevalence of the outcomes across exposure categories and risk differences and ratios were  
229 estimated in the imputed data using the ‘mim: glm’ command in Stata version 15. Population  
230 attributable fractions (PAF) were estimated using the formula  $PAF = \frac{Ppop \times (RR-1)}{Ppop \times (RR-1) + 1} \times 100$  where  
231 *Ppop* is the proportion of exposed participants and *RR* is the risk ratio. PAF estimates the  
232 percentage of cases of the outcome that would be prevented if the exposure was eliminated  
233 (assuming causality and absence of bias). Alternatively, it could be conceptualized as the  
234 percentage of people who go on to develop the adverse outcome that would be included in  
235 interventions targeted at the risk factor of interest. This analysis was performed for each of our  
236 binary outcomes for the following exposures, which were selected to represent a range of  
237 potential ways of identifying high risk groups, most of which have a prevalence broadly similar to  
238 4 or more ACE: 4 or more ACE (19%), low maternal education (CSE, vocational qualifications,  
239 or lower; 30%), manual social class (classes III<sub>m</sub>, IV or V in the 1991 UK Office of Population  
240 Censuses and Surveys classification; 23%), maternal depression in pregnancy (score of 12 or  
241 more on the EPDS on either of the two pregnancy questionnaires; 21%), any self-reported  
242 maternal smoking during pregnancy (26%), social housing during pregnancy (15%) and  
243 maternal age less than 20 years (4%).

244

245 *Data availability*

246 ALSPAC data are available by application to the study executive committee, for details please  
247 see <http://www.bristol.ac.uk/alspac/researchers/access/>. Full details of the derived measures of  
248 ACE used in this paper are published in a Data Note[15], and these data, including analysis  
249 scripts for multiple imputation, are available on request from the ALSPAC study data team.

250

251 **Results**

252 84% of ALSPAC participants were exposed to at least one ACE; 23.6% were exposed to one  
253 ACE, 36.5% to two or three ACE, and 23.8% to four or more ACE (Table 1). The distribution of  
254 the ACE score was similar in males and females (Supplementary table 2). The prevalence of  
255 individual ACE ranged from 4.1% for sexual abuse to 48.6% for parental mental health  
256 problems. The prevalence of most individual ACE was similar in males and females, apart from  
257 sexual abuse, which was reported by 2.3% of males and 6.0% of females (Supplementary table  
258 2). Consistent with a higher rate of missing data in more deprived participants who are more  
259 likely to drop out from the cohort[30], the ACE prevalence estimates were higher in the imputed  
260 data compared with the raw data[15] (Supplemental Table 4).

261

262 Just over half (54.5%) of participants received five or more good GCSEs (Table 1). The  
263 prevalence of health outcomes at age 17 years was 7.3% for obesity, 8.7% for depression,  
264 19.5% for smoking, 16.1% for drug use, and 10.9% for harmful alcohol use (Table 1).

265 **Table 1. Participant characteristics.**

266 Characteristics of the participants included in analyses, using data from multivariate multiple  
 267 imputation. N= 9,959 apart from for health outcomes, where N=4,917

|                                                    | Mean (SE) for continuous variables<br>% for categorical variables |
|----------------------------------------------------|-------------------------------------------------------------------|
| ACE-score: 0                                       | 16.1                                                              |
| 1                                                  | 23.6                                                              |
| 2 to 3                                             | 36.5                                                              |
| 4+                                                 | 23.8                                                              |
| Physical abuse                                     | 19.0                                                              |
| Sexual abuse                                       | 4.1                                                               |
| Emotional abuse                                    | 23.9                                                              |
| Emotional neglect                                  | 23.9                                                              |
| Bullying                                           | 26.2                                                              |
| Violence between parents                           | 25.3                                                              |
| Parental substance abuse                           | 15.1                                                              |
| Parental mental health problems or suicide attempt | 48.6                                                              |
| Parental criminal conviction                       | 10.5                                                              |
| Parental separation                                | 33.8                                                              |
| 5+ GCSEs including math and English at grades A*-C | 54.5                                                              |
| Obesity at age 17 <sup>†</sup>                     | 7.3                                                               |
| Depression at age 17 <sup>†</sup>                  | 8.7                                                               |
| Smoking at age 17 <sup>†</sup>                     | 19.5                                                              |
| Illicit drug use at age 17 <sup>†</sup>            | 16.1                                                              |
| Harmful alcohol use at age 17 <sup>†</sup>         | 10.9                                                              |

268 5+ GCSEs indicates five or more grades A\*-C including English and Mathematics from GCSE or  
 269 equivalent examinations. Obesity is defined as BMI Z-score above cut-offs from the  
 270 International Obesity Task Force (BMI-Z  $\geq$  2.212 for boys and BMI-Z  $\geq$  2.195 for girls).  
 271 Depression is defined as meeting the depression diagnosis criteria of the international  
 272 classification of diseases, 10th revision on the clinical interview schedule-revised (CIS-R).  
 273 Smoking is defined as weekly smoking. Illicit drug use is defined as problematic cannabis use

274 (based on the six-item cannabis abuse screen test) or, in the past 12 months, any use of any of  
275 the following substances: cocaine, amphetamines, inhalants, sedatives, hallucinogens, or  
276 opioids. Harmful alcohol use is defined as  $\geq$  16 on the 10-item alcohol use disorders  
277 identification test (audit).

278 † N=4,917, reflecting the smaller sample size included in multivariate multiple imputation for  
279 health outcomes

280 There was no evidence for sex interactions in most of our analyses (Supplemental Table 5);  
281 therefore, the results of the sex stratified analyses are only mentioned when there was evidence  
282 for a sex interaction ( $p < 0.05$  on likelihood ratio tests for interaction). We describe the results  
283 from analysis of multiply imputed data as our main results; results from complete case analysis  
284 were generally closer to the null than in imputed data, but the overall picture of results was  
285 similar (Supplementary Table 5).

286

### 287 *Association between ACE and educational attainment*

288 Figure 1 and Supplementary Table 5 show the results for the associations of the ACE score and  
289 each individual ACE with educational attainment. The ACE score was strongly associated with  
290 lower educational attainment. Associations were apparent even when comparing those  
291 experiencing only one ACE to those with no ACE (e.g. OR for less than five good GCSEs 1.37,  
292 95% CI: 1.15 to 1.63 after adjustment for confounders) and were stronger for each increasing  
293 value of the ACE score. Experiencing four or more ACE was associated with 50% higher odds  
294 of obtaining less than five good GCSEs (OR 1.46, 95% CI: 1.04 to 2.05) after adjustment for  
295 confounders (Supplemental Table 5).

296

297 Most of the individual ACE were associated with lower educational attainment. The strongest  
298 associations were seen for emotional neglect, e.g. (OR for less than five good GCSEs 1.81,  
299 95% CI 1.49 to 2.2). Associations were weak or absent for physical abuse. For all ACE and all  
300 measures of educational attainment, associations were considerably weaker after adjustment  
301 for confounders. For bullying, there was evidence of a sex interaction, with the associations with  
302 less than five good GCSEs being stronger in females compared with males (Supplemental  
303 Table 5).

304 **Figure 1 Forest plot for the associations of the ACE score and separate ACE with obtaining less than five GCSEs at A\*-C,**  
305 **including maths and English.**

306 The reference category for each category of the ACE score (1, 2-3 and 4+) is experiencing 0 ACE. The basic model is adjusted for  
307 sex. The adjusted model additionally includes home ownership, maternal and partner education, household social class, parity,  
308 ethnicity, maternal age, maternal marital status, maternal and partner depression during pregnancy.

309

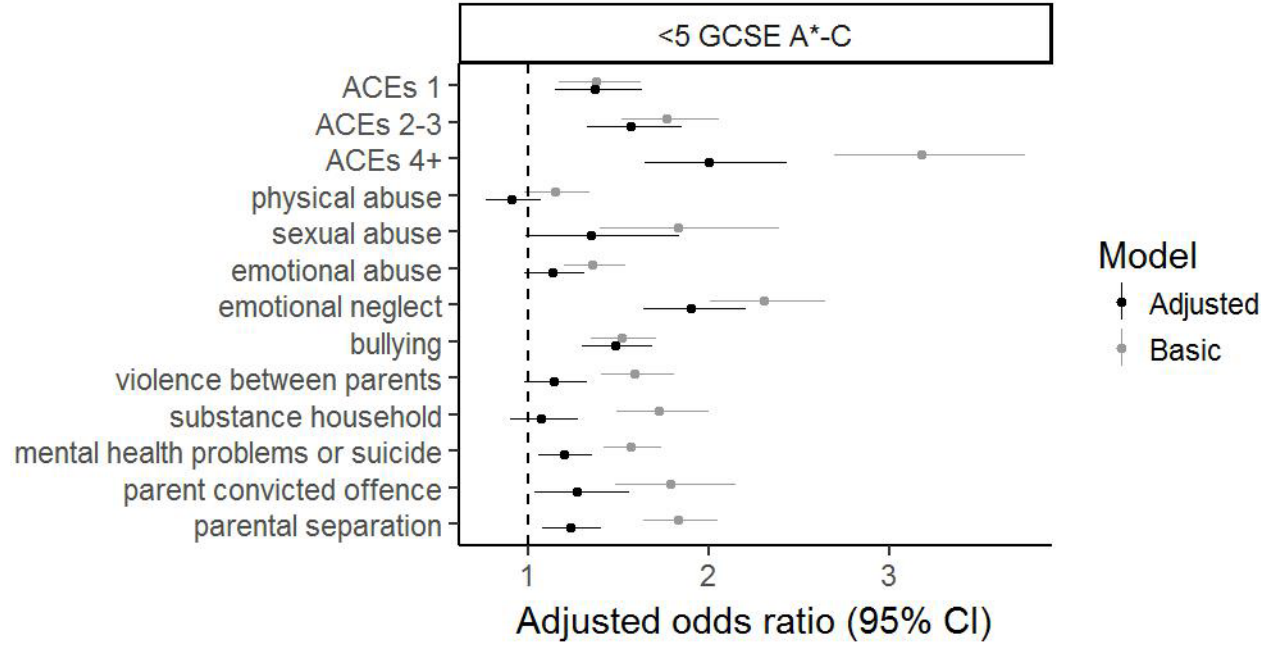

310

311

312

313 There was no consistent evidence of an interaction between ACE and parental social class or  
314 maternal education (Supplementary Tables 6 and 7; Supplementary Figures 1 and 2) in their  
315 relationship with educational outcomes.

316

### 317 *Association between ACE and health/health-related behaviours*

318 The ACE score was strongly associated with depression, illicit drug use, and smoking (Figure 2,  
319 Supplementary Table 5). The group of participants who experienced one ACE had higher odds  
320 of all of these outcomes compared to those who experienced no ACE, but the confidence  
321 intervals included the null apart from for illicit drug use (OR after adjustment for confounders  
322 1.4, 95% CI 1.0 to 2.0). People who experienced two to three, or four or more ACE were more  
323 likely to be depressed, use illicit drugs, and smoke, with associations generally stronger in the  
324 four or more ACE group. People who experienced 4+ ACE were more than twice as likely to  
325 smoke (OR 2.3, 95% CI 1.7 to 3.2), to be depressed (OR 2.5, 95% CI 1.6 to 3.0), and three  
326 times more likely to use illicit drugs (OR 3.0, 95% CI 2.1 to 4.2) compared to people who  
327 experienced no ACE (Supplementary Table 5).

328

329 Obesity and harmful alcohol consumption demonstrated weak associations with the ACE score;  
330 OR for 4+ ACE compared with no ACE was 1.4 for obesity (95% CI 0.9 to 2.2) and 1.4 for  
331 harmful alcohol consumption (95% CI 0.9 to 2.0).

332

333 Examining individual ACE revealed strong associations of: i) physical abuse with depression,  
334 illicit drug use, and smoking, ii) sexual abuse with depression and smoking, iii) emotional abuse  
335 with illicit drug use and smoking, iv) bullying with depression, v) violence between parents with



336 **Figure 2 Forest plots for the associations of the ACE score and separate ACE with poor health outcomes**

337 The reference category for each category of the ACE score (1, 2-3 and 4+) is experiencing 0 ACE. The basic model is adjusted for  
 338 sex. The adjusted model additionally includes home ownership, maternal and partner education, household social class, parity,  
 339 ethnicity, maternal age, maternal marital status, maternal and partner depression during pregnancy.

340

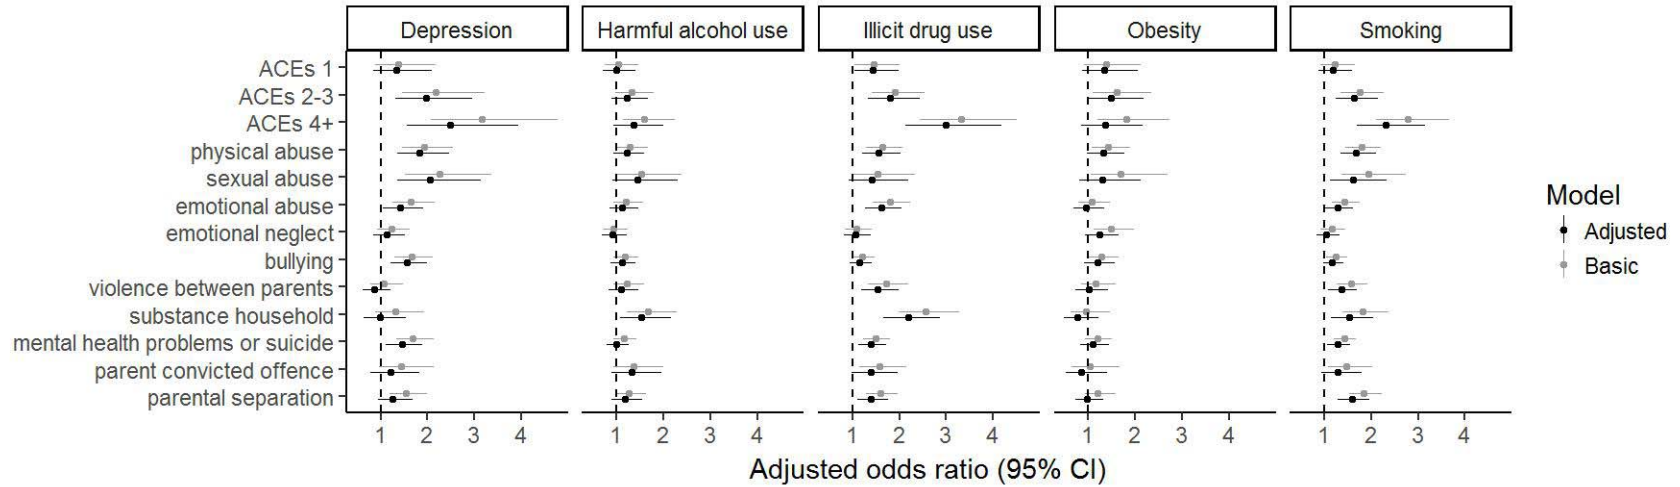

341

342 illicit drug use and smoking, vi) parental substance abuse with harmful alcohol use, illicit drug  
343 use and smoking, vii) parental mental health problems with depression, illicit drug use and  
344 smoking, vii) parental separation with illicit drug use and smoking. Thus overall, the patterns  
345 mirrored those of the ACE score – associations were strong for depression, illicit drug use and  
346 smoking, and weak or absent for obesity and harmful alcohol use. The strongest associations  
347 tended to be seen for physical and sexual abuse, although very strong associations were seen  
348 for parental substance use in relation to substance use outcomes in the offspring.

349

350 In contrast with the educational outcomes, adjustment for sociodemographic confounders did  
351 not markedly attenuate the associations between ACE and health/behavioural outcomes, and in  
352 some instances, adjustment resulted in stronger associations.

353

354 The only sex interaction was for exposure to parental substance abuse and illicit drug use  
355 (Supplemental Table 5), with stratified analyses indicating a stronger association in females  
356 than males (females OR=2.8 95% CI 1.9 to 4.1; males OR=1.7 95% CI 1.1 to 2.6).

357

358 Consistent with the educational outcomes, there was no evidence that associations between  
359 ACE and health and behavioural outcomes differed according to parental social class or  
360 maternal education (Supplementary Tables 6 and 7 and Supplementary Figures 1 and 2).

361

362 *Population attributable fractions*

363 Differences in risk of achieving less than five good GCSEs (Table 2) ranged from 11% (95% CI  
 364 9% to 14%) for maternal depression during pregnancy to 35% (95% CI 32% to 37%) for social  
 365 housing. All but one sociodemographic factor (maternal depression) had risk differences (RDs)  
 366 that were higher than for 4+ ACE (RD 18%, 95% CI 15% to 20%). The lowest PAF was for  
 367 maternal age less than 20 years (2%), reflecting the low prevalence of this risk factor. The  
 368 highest PAF was for maternal education (19%). This compares to 9% for 4+ ACE.

369

370 **Table 2. Associations of ACE and various sociodemographic markers with educational**  
 371 **attainment on the risk difference scale, and population attributable fractions**

372 PAF = population attributable fraction; the proportion of the people experiencing <5 good  
 373 GCSEs who also experienced the 'exposure' (ACE or sociodemographic variable); can be  
 374 interpreted as the proportion of the cases of <5 GCSEs that could be prevented if the exposure  
 375 was eliminated, assuming causality. Note that the reference categories in this table differ from  
 376 those in other parts of the manuscript; here, the reference category is all other participants apart  
 377 from those with the exposure, for example the reference category for 4+ ACE here is <4 ACE.

378

|                                                    | <i>Prevalence of exposure</i> | <i>Less than 5 good GCSEs</i> |                         |                          |     |
|----------------------------------------------------|-------------------------------|-------------------------------|-------------------------|--------------------------|-----|
|                                                    |                               | Prevalence in exposed         | Prevalence in unexposed | Risk difference (95% CI) | PAF |
| 4 or more ACEs                                     | 19.0%                         | 59.1%                         | 41.2%                   | 18% (15% to 20%)         | 9%  |
| Low maternal education (CSE, vocational, or lower) | 29.6%                         | 65.6%                         | 36.8%                   | 29% (27% to 31%)         | 19% |
| Manual social class (III manual and lower)         | 22.9%                         | 64.8%                         | 39.4%                   | 25% (23% to 28%)         | 13% |
| Maternal depression in pregnancy                   | 20.5%                         | 54.3%                         | 43.1%                   | 11% (9% to 14%)          | 5%  |
| Any maternal smoking in pregnancy                  | 25.7%                         | 59.6%                         | 40.4%                   | 19% (17% to 21%)         | 11% |
| Social housing                                     | 14.5%                         | 75.3%                         | 40.4%                   | 35% (32% to 37%)         | 11% |
| Mother aged 19 years or lower at birth             | 3.6%                          | 74.6%                         | 44.5%                   | 30% (25% to 35%)         | 2%  |

379

380

381 The highest obesity PAFs were seen for socioeconomic markers; e.g. the PAFs for social  
382 housing and low maternal education were 14% and 13% respectively, compared with 5% for 4+  
383 ACE (Table 3). In contrast, PAFs for illicit drug use and depression were highest for 4+ ACE,  
384 with high PAFs also seen for maternal smoking in pregnancy and relatively low PAFs for  
385 socioeconomic and other family measures. For example, the PAFs of depression for 4+ ACE,  
386 maternal smoking during pregnancy and manual social class were 14%, 10% and 3%  
387 respectively.

388

389 Harmful alcohol use and smoking exhibited a different pattern again; the highest PAF for each  
390 of these outcomes was for maternal smoking during pregnancy – 11% for harmful alcohol use  
391 and 15% for smoking. PAFs for 4+ ACE were 6% for harmful alcohol use and 12% for smoking.  
392 Socioeconomic markers had lower PAFs for harmful alcohol use, but PAFs for smoking were  
393 similar to the PAF for 4+ ACE, e.g. PAF for manual social class in relation to smoking was 10%.

394 **Table 3. Associations of ACE and various sociodemographic markers with health and**  
 395 **health risk behaviours on the risk difference scale, and population attributable fractions**

396 PAF = population attributable fraction; the proportion of the people experiencing each outcome  
 397 (depression, illicit drug use, obesity, harmful alcohol use, or smoking) who also experienced the  
 398 'exposure' (ACE or sociodemographic variable); can be interpreted as the proportion of the  
 399 outcome cases that could be prevented if the exposure was eliminated, assuming causality.  
 400 Note that the reference categories in this table differ from those in other parts of the manuscript;  
 401 here, the reference category is all other participants apart from those with the exposure, for  
 402 example the reference category for 4+ ACE here is <4 ACE.

|                                                    | <i>Prevalence of exposure</i> | <b>Outcome prevalence in exposed</b> | <b>Outcome prevalence in unexposed</b> | <b>Risk difference (95% CI)</b> | <b>PA</b> |
|----------------------------------------------------|-------------------------------|--------------------------------------|----------------------------------------|---------------------------------|-----------|
| <b><i>Depression</i></b>                           |                               |                                      |                                        |                                 |           |
| 4 or more ACEs                                     | 16.6%                         | 13.3%                                | 7.5%                                   | 6% (4% to 8%)                   | 14%       |
| Low maternal education (CSE, vocational, or lower) | 19.4%                         | 9.0%                                 | 8.6%                                   | 0% (-2% to 2%)                  | 1%        |
| Manual social class (III manual and lower)         | 16.8%                         | 10.0%                                | 8.4%                                   | 2% (-1% to 4%)                  | 3%        |
| Maternal depression in pregnancy                   | 17.3%                         | 11.9%                                | 7.9%                                   | 4% (2% to 6%)                   | 8%        |
| Any maternal smoking in pregnancy                  | 17.9%                         | 12.7%                                | 7.8%                                   | 5% (3% to 7%)                   | 10%       |
| Social housing                                     | 8.5%                          | 14.1%                                | 8.1%                                   | 6% (3% to 9%)                   | 6%        |
| Mother aged 19 years or lower at birth             | 1.7%                          | 19.1%                                | 8.5%                                   | 11% (2% to 19%)                 | 2%        |
|                                                    |                               |                                      |                                        |                                 |           |
| <b><i>Illicit drug use</i></b>                     |                               |                                      |                                        |                                 |           |
| 4 or more ACEs                                     | 16.6%                         | 25.4%                                | 13.7%                                  | 12% (9% to 15%)                 | 15%       |
| Low maternal education (CSE, vocational, or lower) | 19.4%                         | 14.6%                                | 16.4%                                  | -2% (-4% to 1%)                 | 2%        |
| Manual social class (III manual and lower)         | 16.8%                         | 19.8%                                | 15.2%                                  | 5% (2% to 7%)                   | 5%        |
| Maternal depression in pregnancy                   | 17.3%                         | 20.4%                                | 15.1%                                  | 5% (2% to 8%)                   | 6%        |
| Any maternal smoking in pregnancy                  | 17.9%                         | 23.3%                                | 14.4%                                  | 9% (6% to 12%)                  | 10%       |
| Social housing                                     | 8.5%                          | 20.7%                                | 15.6%                                  | 5% (1% to 9%)                   | 3%        |
| Mother aged 19 years or lower at birth             | 1.7%                          | 26.3%                                | 15.9%                                  | 10% (1% to 20%)                 | 1%        |
|                                                    |                               |                                      |                                        |                                 |           |
| <b><i>Obesity</i></b>                              |                               |                                      |                                        |                                 |           |
| 4 or more ACEs                                     | 16.6%                         | 8.7%                                 | 6.9%                                   | 2% (-0% to 4%)                  | 5%        |
| Low maternal education (CSE, vocational, or lower) | 19.4%                         | 11.1%                                | 6.3%                                   | 5% (3% to 7%)                   | 13%       |
| Manual social class (III manual and lower)         | 16.8%                         | 10.4%                                | 6.6%                                   | 4% (2% to 6%)                   | 9%        |
| Maternal depression in pregnancy                   | 17.3%                         | 8.5%                                 | 7.0%                                   | 2% (-0% to 4%)                  | 4%        |
| Any maternal smoking in pregnancy                  | 17.9%                         | 10.5%                                | 6.5%                                   | 4% (2% to 6%)                   | 10%       |

|                                                    |       |       |       |                  |     |
|----------------------------------------------------|-------|-------|-------|------------------|-----|
| Social housing                                     | 8.5%  | 17.3% | 6.3%  | 11% (7% to 15%)  | 14' |
| Mother aged 19 years or lower at birth             | 1.7%  | 12.5% | 7.2%  | 5% (-2% to 12%)  | 19  |
| <b><i>Harmful alcohol use</i></b>                  |       |       |       |                  |     |
| 4 or more ACEs                                     | 16.6% | 13.6% | 10.3% | 3% (1% to 6%)    | 69  |
| Low maternal education (CSE, vocational, or lower) | 19.4% | 11.5% | 10.8% | 1% (-2% to 3%)   | 19  |
| Manual social class (III manual and lower)         | 16.8% | 11.9% | 10.7% | 1% (-1% to 4%)   | 29  |
| Maternal depression in pregnancy                   | 17.3% | 14.7% | 10.1% | 5% (2% to 7%)    | 89  |
| Any maternal smoking in pregnancy                  | 17.9% | 16.2% | 9.8%  | 6% (4% to 9%)    | 11' |
| Social housing                                     | 8.5%  | 12.4% | 10.8% | 2% (-2% to 5%)   | 19  |
| Mother aged 19 years or lower at birth             | 1.7%  | 12.7% | 10.9% | 2% (-5% to 9%)   | <1' |
| <b><i>Smoking</i></b>                              |       |       |       |                  |     |
| 4 or more ACEs                                     | 16.6% | 29.0% | 17.1% | 12% (9% to 15%)  | 12' |
| Low maternal education (CSE, vocational, or lower) | 19.4% | 25.1% | 18.1% | 7% (4% to 10%)   | 79  |
| Manual social class (III manual and lower)         | 16.8% | 28.6% | 17.5% | 11% (8% to 14%)  | 10' |
| Maternal depression in pregnancy                   | 17.3% | 24.2% | 18.5% | 6% (3% to 9%)    | 59  |
| Any maternal smoking in pregnancy                  | 17.9% | 32.9% | 16.5% | 16% (13% to 20%) | 15' |
| Social housing                                     | 8.5%  | 31.8% | 18.3% | 14% (9% to 18%)  | 69  |
| Mother aged 19 years or lower at birth             | 1.7%  | 25.1% | 19.4% | 6% (-4% to 15%)  | 19  |

403

404 **Discussion**

405

406 In this UK cohort, where 84% of participants were exposed to at least one ACE and 24% were  
407 exposed to four or more ACE, we find evidence that ACE – both when considered together as  
408 an ACE score and separately as individual ACE – are associated with lower educational  
409 attainment and worse health and health-related behaviours. Adjustment for a wide range of  
410 family and socioeconomic variables reduced the magnitude of associations of ACE with  
411 educational attainment by approximately half. However, adjusted associations between ACE  
412 and educational attainment were still strong, and similar in magnitude to the strongest  
413 associations between ACE and health/health-related behaviours. Adjustment for confounders  
414 did not attenuate associations between ACE and health and health-related behaviours. We  
415 found no evidence that higher SEP acted as a buffer to the adverse effects of ACE; associations  
416 between ACE and both educational and health outcomes were similar in adolescents with  
417 parents from manual and non-manual occupational social classes and for adolescents with low  
418 and high levels of maternal education. When calculating the proportion of cases of each  
419 outcome attributable to 4+ ACE or various family and socioeconomic measures, we found a  
420 different pattern of results across the outcomes. For education and obesity, the highest PAF  
421 were observed for socioeconomic markers. In contrast, PAFs for illicit drug use and depression  
422 were highest for 4+ ACE, and for harmful alcohol use and smoking the highest PAF was for  
423 maternal smoking during pregnancy.

424

425 The attenuation of ACE effects on education by half when adjusting for family and  
426 socioeconomic factors suggests that the family and socioeconomic context is responsible for a  
427 considerable proportion of these associations. However, most studies of the social and health

428 sequelae of ACE do not include the broad range of confounders that we included.  
429 Consequently, they may be overestimating the impact of ACE. Although we adjusted for a wide  
430 array of factors, we are unlikely to have captured all relevant concepts, and our measurements  
431 will not perfectly capture the concepts of interest. For example, current housing tenure may not  
432 completely capture life course trajectories of housing tenure, and does not fully capture  
433 crowding, damp, residential instability, and other important aspects of housing. Therefore,  
434 residual confounding is likely to be present, and our estimates of the educational impact of ACE  
435 are likely to be overestimates. In contrast, our results indicate that, at least in this population,  
436 the associations of ACE with health and health-related behaviours in adolescence were not  
437 strongly affected by adjustment for sociodemographic confounders, suggesting that ACE are  
438 associated with these outcomes regardless of the family and sociodemographic setting in which  
439 they are experienced. The degree to which previous studies have adjusted for potential  
440 confounding variables varies considerably, with some studies making no attempt at  
441 adjustment.[6] Studies that do adjust for a range of factors differ in whether this adjustment  
442 leaves associations largely unchanged[31] or results in considerable attenuation.[1]

443

444 Our *a priori* hypothesis was that associations between ACE and adverse educational and health  
445 outcomes would be weaker in adolescents from high SEP families, as other aspects of a high  
446 SEP environment could act to mitigate the effects of ACE. We found no evidence to support this  
447 hypothesis; associations were of similar magnitude in manual and non-manual social class  
448 families and in families with high and low levels of maternal education. Other studies have also  
449 found no differences in associations between ACE and outcomes according to socioeconomic  
450 position[32] or race[31], and one study found either no difference in ACE-outcome associations  
451 according to income, or stronger associations in high-income groups.[14] Together, these



452 findings support universal ACE prevention or support interventions, rather than focusing ACE  
453 initiatives only in low socioeconomic population groups.

454

455 Population attributable fractions (PAFs) estimate the proportion of an outcome that could be  
456 eliminated if the exposure is removed from the population. This interpretation of a PAF requires  
457 unrealistically strong assumptions about causality and lack of bias. Since the exposures we  
458 examine are inter-related, the PAFs should also not be considered in isolation, because a joint  
459 PAF for all exposures considered together is likely to be considerably smaller than implied by  
460 the individual PAFs. Nonetheless, the comparative magnitude of PAFs across exposures may  
461 be informative. Our results imply that ACE-focused interventions may have less impact on  
462 population-level educational attainment compared with interventions or policies that address  
463 socioeconomic disadvantage, whereas ACE-focused initiatives may yield the greatest  
464 population-level effects on depression and drug use in adolescents. The findings for smoking  
465 and harmful alcohol use may reflect family-level propensity for risky behavior and  
466 intergenerational transmission of behaviours. For all outcomes, PAFs were relatively low –  
467 ranging from 1 to 15% across all exposures, and 5 to 15% for four or more ACE. Thus, between  
468 5-15% of the cases of low educational attainment and poor health/health-related behaviour  
469 occurred in the participants who experienced four or more ACE, meaning that interventions  
470 targeting subgroups based on solely exposure to ACE will fail to prevent most cases.

471

472 Within the ALSPAC cohort, there is a vast amount of information, mainly prospectively collected  
473 from both young people and their mothers, from various time points and life stages. This vast  
474 array of data, considered together, resulted in a higher prevalence of many ACE than is seen in  
475 some other studies. For example, in the Welsh ACE study, one in seven participants reported

476 four or more ACE[33], compared with one in four in ALSPAC. Studies using a single  
477 retrospective questionnaire may be underestimating the prevalence of ACE. However, it is also  
478 possible that our cohort is identifying a set of people for whom experience of ACE has been less  
479 severe or of shorter duration than those identified in cross-sectional studies collecting  
480 retrospective reports of ACE exposure at a single time point in adults. There is evidence that  
481 retrospective and prospective reports of ACE capture largely non-overlapping groups of  
482 individuals, but that both groups are at risk from adverse outcomes.[34, 35]

483

484 Although using data from multiple questionnaires across a long period of time enabled us to  
485 capture a detailed picture of the cohort members' experience of ACE, data missingness became  
486 a challenge. We assumed that the data are missing-at-random given the variables included in  
487 the imputation model. Although this assumption is untestable, it allows for maximum use of the  
488 available data, and we included a number of key sociodemographic variables in the imputation  
489 model to make this assumption more plausible. In general, we would anticipate that deviations  
490 from the missing at random assumption would lead to underestimation of the ACE prevalence  
491 and potentially bias associations of ACE with adverse outcomes towards the null.[30] ALSPAC  
492 is a geographical cohort based in the South West of England, and has slightly higher levels of  
493 socioeconomic advantage and lower levels of ethnic diversity than the national average, and  
494 this may affect the generalisability of our findings.

495

496 We used two ways of conceptualizing ACE – first as a score of the number of ACE experienced,  
497 and second considering each ACE separately. Although the ACE score is widely used and has  
498 advantages including the recognition that ACE tend to co-occur and the worst outcomes tend to  
499 be for people exposed to multiple ACE, it is also problematic in several ways. For example, it

500 assumes that each ACE has the same magnitude and direction of association with the  
501 outcome[36]; our analysis of individual ACE demonstrates this not to be the case. Nonetheless,  
502 we opted to use the ACE score approach rather than alternative grouping methods such as  
503 factor analysis or latent class models[37], to be consistent with other studies. When analyzing  
504 each individual ACE, we did not adjust for other ACE as covariates. The rationale for this is that  
505 the causal structure linking multiple ACE is complex and largely unknown. Some adjustments  
506 would therefore be over-adjustment, removing some of the effect of interest.

507

508 Our results suggest strong associations of ACE with lower educational attainment and worse  
509 health and health-related behaviours in late adolescence that are robust to adjustment for a  
510 wide range of variables describing the family and socioeconomic context. However, our data  
511 indicate that people experiencing 4+ ACE contribute between 5-15% of the cases of adverse  
512 educational and health outcomes considered in this study. This implies that prevention of ACE  
513 or improved support for people who experience ACE, whilst beneficial, would not affect the vast  
514 majority of people experiencing adverse educational and health outcomes in adolescence. The  
515 loss of human potential associated with ACE has led to urgent calls for ACE-awareness and  
516 action, to ensure that young people reach their developmental potential. There has been an  
517 upsurge of discussion about ACE in both the research and policy spheres. Our results suggest  
518 that, while welcome, interventions targeted at ACE prevention/support should be considered  
519 alongside other risk factors, including socioeconomic deprivation, parental substance use and  
520 mental health.

521 Acknowledgments: We are extremely grateful to all the families who took part in this study, the  
522 midwives for their help in recruiting them, and the whole ALSPAC team, which includes  
523 interviewers, computer and laboratory technicians, clerical workers, research scientists,  
524 volunteers, managers, receptionists and nurses.

525

526

527

## References

1. Jaffee, S.R., et al., *Childhood Maltreatment Predicts Poor Economic and Educational Outcomes in the Transition to Adulthood*. Am J Public Health, 2018. **108**(9): p. 1142-1147.
2. Romano, E., et al., *Childhood Maltreatment and Educational Outcomes*. Trauma Violence Abuse, 2015. **16**(4): p. 418-37.
3. Pinto Pereira, S.M., L. Li, and C. Power, *Child Maltreatment and Adult Living Standards at 50 Years*. Pediatrics, 2017. **139**(1).
4. Khambati, N., et al., *Educational and emotional health outcomes in adolescence following maltreatment in early childhood: A population-based study of protective factors*. Child Abuse Negl, 2018. **81**: p. 343-353.
5. Metzler, M., et al., *Adverse childhood experiences and life opportunities: Shifting the narrative*. Children and Youth Services Review, 2017. **72**: p. 141-149.
6. Hughes, K., et al., *The effect of multiple adverse childhood experiences on health: a systematic review and meta-analysis*. Lancet Public Health, 2017. **2**(8): p. e356-e366.
7. Kinner, S.A. and R. Borschmann, *Inequality and intergenerational transmission of complex adversity*. Lancet Public Health, 2017. **2**(8): p. e342-e343.
8. Smith, L. *Adverse childhood experiences (ACEs): educational interventions*. ESSS outline. <https://www.iriss.org.uk/resources/esss-outlines/aces>. 2018 10/04/2019].
9. ACE Aware Wales. *ACE Aware Wales*. <https://www.aceawarewales.com/about/>. 2019 10/04/2019].
10. ACE-Aware Scotland. *Increasing awareness of adverse childhood experiences*. <http://aceawarescotland.com/>. 2019 10/04/2019].
11. Finkelhor, D., et al., *Improving the adverse childhood experiences study scale*. JAMA Pediatr, 2013. **167**(1): p. 70-5.
12. Pelton, L.H., *Child abuse and neglect: the myth of classlessness*. Am J Orthopsychiatry, 1978. **48**(4): p. 608-17.
13. Freisthler, B., D.H. Merritt, and E.A. LaScala, *Understanding the ecology of child maltreatment: a review of the literature and directions for future research*. Child Maltreat, 2006. **11**(3): p. 263-80.
14. Halfon, N., et al., *Income Inequality and the Differential Effect of Adverse Childhood Experiences in US Children*. Acad Pediatr, 2017. **17**(7s): p. S70-s78.
15. Houtepen, L.C., et al., *Adverse childhood experiences in the children of the Avon Longitudinal Study of Parents and Children (ALSPAC)*. Wellcome Open Research, 2018. **3**: p. 106.
16. Hughes, M. and W. Tucker, *Poverty as an Adverse Childhood Experience*. N C Med J, 2018. **79**(2): p. 124-126.
17. Children 1st. *Poverty and adverse childhood experiences*. <https://www.children1st.org.uk/blog/poverty-and-adverse-childhood-experiences-aces/>. 2019 10/04/2019].
18. Taylor-Robinson, D.C., V.S. Straatmann, and M. Whitehead, *Adverse childhood experiences or adverse childhood socioeconomic conditions?* Lancet Public Health, 2018. **3**(6): p. e262-e263.

19. Traub, F. and R. Boynton-Jarrett, *Modifiable Resilience Factors to Childhood Adversity for Clinical Pediatric Practice*. Pediatrics, 2017. **139**(5).
20. Klika, J.B. and T.I. Herrenkohl, *A review of developmental research on resilience in maltreated children*. Trauma Violence Abuse, 2013. **14**(3): p. 222-34.
21. Cicchetti, D., *Annual Research Review: Resilient functioning in maltreated children--past, present, and future perspectives*. J Child Psychol Psychiatry, 2013. **54**(4): p. 402-22.
22. Boyd, A., et al., *Cohort Profile: The 'Children of the 90s'--the index offspring of the Avon Longitudinal Study of Parents and Children*. Int J Epidemiol, 2012.
23. Fraser, A., et al., *Cohort Profile: The Avon Longitudinal Study of Parents and Children: ALSPAC mothers cohort*. Int J Epidemiol, 2012.
24. World Health Organization. *Adverse Childhood Experiences International Questionnaire (ACE-IQ)*. [http://www.who.int/violence\\_injury\\_prevention/violence/activities/adverse\\_childhood\\_experiences/en/](http://www.who.int/violence_injury_prevention/violence/activities/adverse_childhood_experiences/en/). 2018 10/04/2019].
25. Babor, T.F., et al. *AUDIT. The Alcohol Use Disorders Identification Test. Guidelines for use in primary care*. [http://whqlibdoc.who.int/hq/2001/WHO\\_MSD\\_MSB\\_01.6a.pdf](http://whqlibdoc.who.int/hq/2001/WHO_MSD_MSB_01.6a.pdf). 2001 10/04/2019].
26. Lewis, G., *Assessing psychiatric disorder with a human interviewer or a computer*. J Epidemiol Community Health, 1994. **48**(2): p. 207-10.
27. Legleye, S., et al., *Validation of the CAST, a general population Cannabis Abuse Screening Test*. J Subst Use, 2007. **12**(4): p. 233-242.
28. Enders, C.K., *Applied missing data analysis*. Methodology in the Social Sciences, ed. T.D. Little. 2010: Guilford Press.
29. Meng, X.L. and D.B. Rubin, *Performing likelihood ratio tests with multiply-imputed data sets*. Biometrika, 1992. **79**(1): p. 103-111.
30. Howe, L.D., et al., *Loss to follow-up in cohort studies: bias in estimates of socioeconomic inequalities*. Epidemiology, 2013. **24**: p. 1-9.
31. Copeland, W.E., et al., *Association of Childhood Trauma Exposure With Adult Psychiatric Disorders and Functional Outcomes*. JAMA Netw Open, 2018. **1**(7): p. e184493.
32. Bjorkenstam, E., et al., *Multi-exposure and clustering of adverse childhood experiences, socioeconomic differences and psychotropic medication in young adults*. PLoS One, 2013. **8**(1): p. e53551.
33. Wales, P.H. *Adverse Childhood Experiences and their impact on health-harming behaviours in the Welsh adult population*. [http://www2.nphs.wales.nhs.uk:8080/PRIDDocs.nsf/7c21215d6d0c613e80256f490030c05a/d488a3852491bc1d80257f370038919e/\\$FILE/ACE%20Report%20FINAL%20\(E\).pdf](http://www2.nphs.wales.nhs.uk:8080/PRIDDocs.nsf/7c21215d6d0c613e80256f490030c05a/d488a3852491bc1d80257f370038919e/$FILE/ACE%20Report%20FINAL%20(E).pdf). 2015 10/04/2019].
34. Newbury, J.B., et al., *Measuring childhood maltreatment to predict early-adult psychopathology: Comparison of prospective informant-reports and retrospective self-reports*. Journal of Psychiatric Research, 2018. **96**: p. 57-64.
35. Baldwin, J.R., et al., *Agreement Between Prospective and Retrospective Measures of Childhood Maltreatment: A Systematic Review and Meta-analysis*. JAMA Psychiatry, 2019.

36. Howe, L.D., K. Tilling, and D.A. Lawlor, *Studying the life course health consequences of childhood adversity: challenges and opportunities*. *Circulation*, 2015. **131**(19): p. 1645-7.
37. Caleyachetty, R., et al., *Modeling Exposure to Multiple Childhood Social Risk Factors and Physical Capability and Common Affective Symptoms in Later Life*. *J Aging Health*, 2018. **30**(3): p. 386-407.
